# Supplementary material for: Conditionally Replicating Vectors Mobilize Chimeric Antigen Receptors against HIV
Source: PubMed Central journal article supplement — Mol Ther Methods Clin Dev. 2020 Sep 28;19:285–94. doi: 10.1016/j.omtm.2020.09.014 (PMC7569266; doi:10.1016/j.omtm.2020.09.014), 2020-09-28
Supplement: mmc1.pdf [file mmc1.pdf]

**OMTM, Volume 19**

**Supplemental Information**

**Conditionally Replicating Vectors Mobilize**

**Chimeric Antigen Receptors against HIV**

**Ryan Z. Urak, Citradewi Soemardy, Roslyn Ray, Shirley Li, Galina Shevchenko, Tristan Scott, Laura Lim, Xiuli Wang, and Kevin V. Morris**

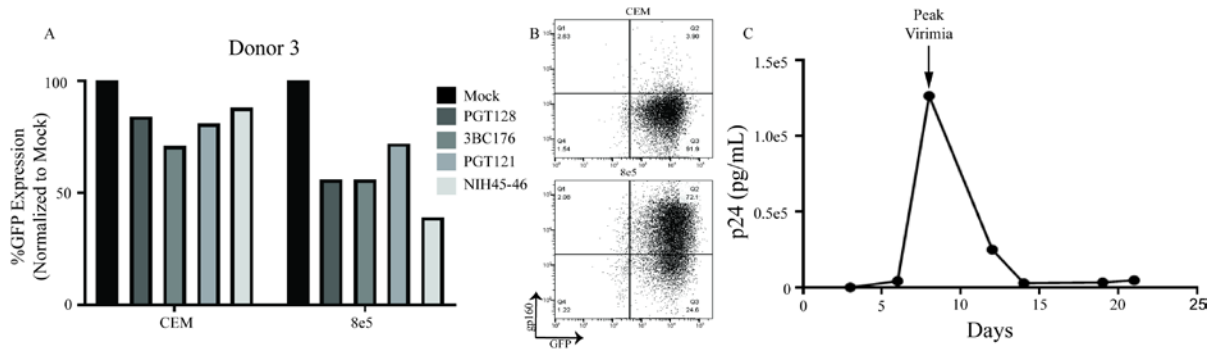

**Figure S1.** Developing anti-gp120 CAR T cells. (a) Donor 3 of various neutralizing scFv CAR T cells were cultured with GFP-expressing 8e5 cells for 4 days prior to analyzing cell-line survival by flow cytometry. Mock-transduced T cells were used as control. Technical replicates were not performed on this experiment (b) Flow cytometric analysis of gp120 expression of CEM and 8e5 cells. (c) HIV donor CD3<sup>+</sup> enriched PBMCs were activated and expanded. Supernatant was collected over the course of culture. Supernatant was analyzed for p24 through ELISA.

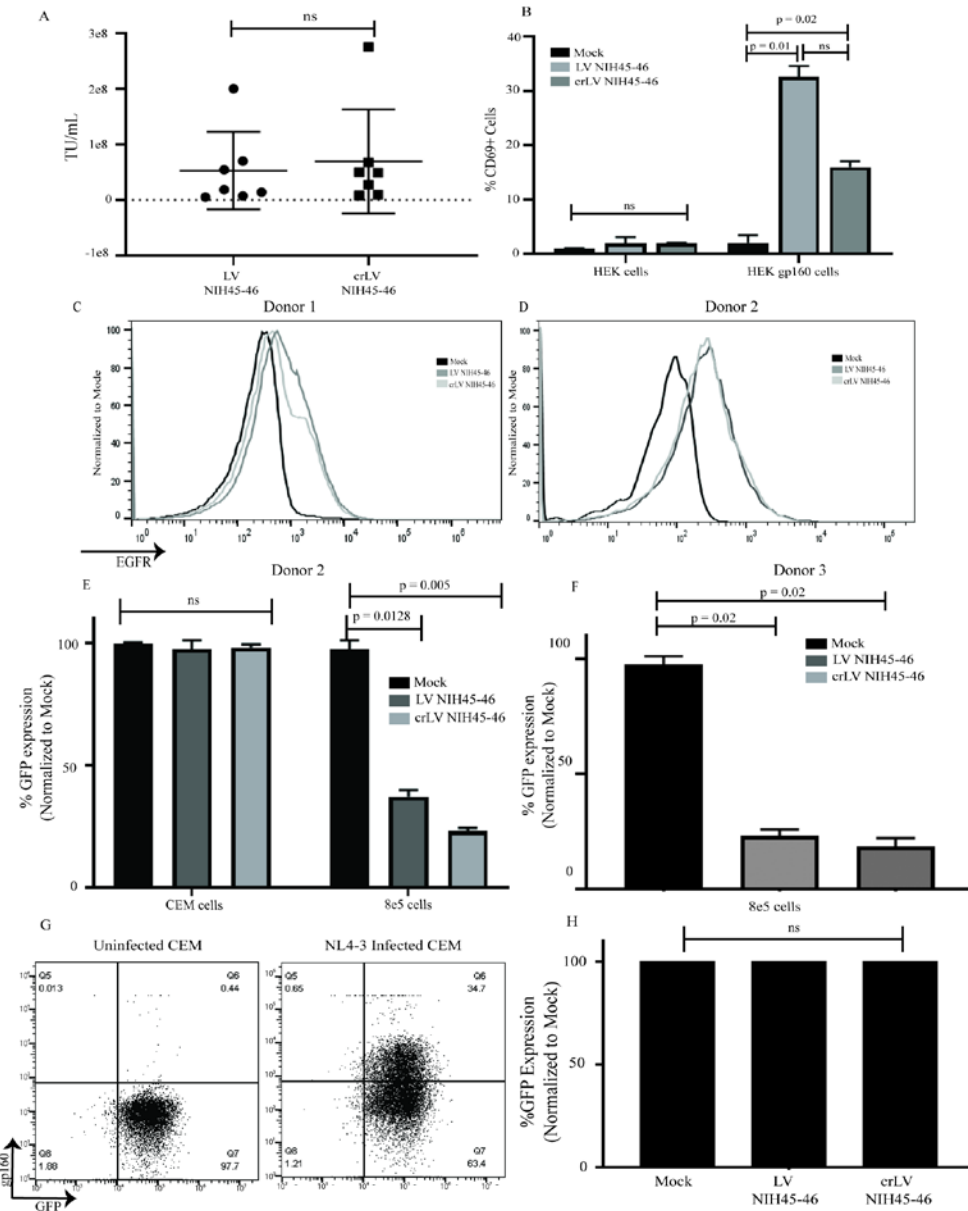

**Figure S2.** Development and validation of crLV-derived NIH45-46 CAR. (a) Flow cytometric analysis of titers units per mL (TU/mL) of crLV- and LV-derived NIH45-46 CAR using antibody specific for EGFR. (b) The crLV- and LV-derived NIH45-46 CAR transduced Jurkat cells were co-cultured with HEK293 cells with or without gp160 expression for 24 hours before analyzing CD69 expression through flow cytometry. Mock-transduced Jurkat cells were used as controls. (c-d) Flow cytometric analysis for EGFR determined the transduction efficiency of donor 1 (c) and donor 2 (d) CAR T cells. Mock transduced T cells were used as a staining control. (e-f) Donor 2 (e) and 3 (f) crLV- and LV-derived NIH45-46 CAR T cells were cultured with GFP-expressing 8e5 cells for 4 days prior to analyzing cell-line survival by flow cytometry. Mock-transduced T cells were used as control (g) Flow cytometric analysis of gp120 expression of NL4-3 infected CEM cell line. (h) crLV- and LV-derived NIH45-46 CEM cell-lines were cultured with GFP-expressing 8e5 cells for 4 days prior to analyzing cell-line survival by flow cytometry.

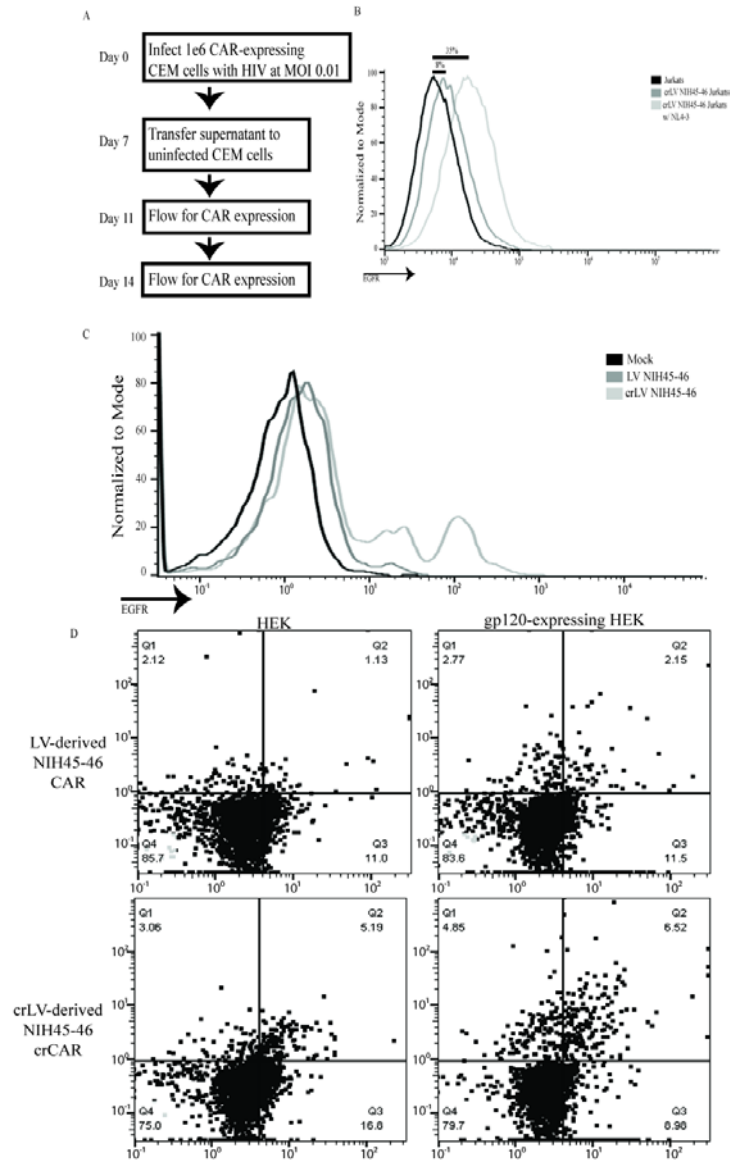

**Figure S3.** Confirming mobilization of crLV-derived NIH45-46 CAR T cells. (a) The workflow for the mobilization assay. (b) crLV-derived NIH45-46 CAR Jurkat cells with or without NL4-3 infection expanded for 8 days prior to flow cytometric analysis of CAR expression. (c) Donor 2 CD4 analysis of crLV- and LV- derived NIH45-46 CAR expression in HIV-donor T cells. (d) Donor 2 crLV- or LV-derived NIH45-46 transduced T cells were co-cultured with GFP-expressing HEK.GP160s or HEKs for 24 hours prior to analyzing CD137 expression by flow cytometry. This is a representative sample of technical replicates n=2.

| Antibody    | Specificity        | Chain | Sequence                                                                                                                                                                                                                                               |
|-------------|--------------------|-------|--------------------------------------------------------------------------------------------------------------------------------------------------------------------------------------------------------------------------------------------------------|
| 1. NIH45-46 | CD4 Binding Domain | VL    | EVLTSQPATLSLSPGETAIASCRITSQSGLAWYQQRPQAPRLVYSGSTRAAAGIPDRFSGSRWGWADVNLISINLESQDFGVVYCOQYEFFGGTKVQVDIK<br>QVRLSQSGGQMKKPKGIESMRLSQRASGYEFLNCPINWIRLAPGRRPEWMMGWILKPRGGAMVNYARKFQGRVTMTDRDVSDDTALELRSLTSDDTAVYECTRGKYCTARDYNNWDFEHWGRGAPVTYSS            |
| 2. PGT121   | V3 glycan          | VL    | SDISVAPGETARISCGEKSLSGRRAVQWVQHRAGGAPSLIYNNQDRPSPGIPERFSGSPDPSFGTTATLTTISVEAGDEADYCHIWDSRVPPTKWWFFGGGTLTV<br>QMQLQESGPGQLVKPSETLSLTCVSVGASISDSYWSWIRRRSPGKLEWIGVYHKSQDNTYSPSLKSRVNLSLDTSKNQVLSLVAATAADSGKYYCARTLHGRRIVGVAFNEWFTYFPMDWVWGNIGTOVTVSS     |
| 3. PGT128   | V3 glycan          | VL    | QSAALTPPSASGSPGQSTTISCTGTINNIFVSWVQOHAGKAPKLVYDVNKRKPSGVPDRFSGSKSGNTASLTVSGLQTDDEAVVYCGSLVGNWWDVIFGGGTLTVL<br>QPQLQESGPTLVEASETTLSTCAVSGDSTAAACNSFWGWRPQPGKLEWVWGSLSHCASVWNRGWTYHNPISLKSRLTLALDTPKNIVFLKINSVTAADTATYVCARFGGEVLRITDWPKPAWVDLWGRGTLVTVSS |
| 4. 3BC176   | CD4/V3 Loop        | VL    | QSVLTPPASVSPGQSTTVSCTGSRNDVGGYDFVSWYQRHHPGGVPKLIYEISKRPSPGIPQRFSGSRSGNTASLTVSGLQDDDEADYCCSVASYDRLLFGGGTRVSVL<br>QVQLMQSGAQLRDPGDSLKISKASGYNFIDYHIHWVRLAPGRGLEWMMGWIDPVGGITKYAGQFQGRSLSTRDTSNTLFLLELRLTAGDITAVYFCARSMRDPVDHGDVSGLFLVHFHWGRGSDVTVSS      |

**Table S1. CAR scFV amino acid sequences of the variable heavy (VH) and light (VL) chain for CAR constructs**
